# Supplementary material for: Redox-dependent Regulation of Gluconeogenesis by a Novel Mechanism Mediated by a Peroxidatic Cysteine of Peroxiredoxin
Source: PubMed Central journal article supplement (PMC5025857; doi:10.1038/srep33536), 2016-09-16
Supplement: srep33536-s1.pdf [file srep33536-s1.pdf]

## **Supplemental information**

### **Redox-dependent Regulation of Gluconeogenesis by a Novel Mechanism Mediated by a Peroxidatic-Cysteine of Peroxiredoxin**

Hayato Irokawa, Tsuyoshi Tachibana, Toshihiko Watanabe, Yuka Matsuyama, Hozumi Motohashi, Ayako Ogasawara, Kenta Iwai, Akira Naganuma and Shusuke Kuge



**A: YDE**

1 CFAKGTNVL<sup>\*</sup>M ADGSIECIEN IEVGNK VMGKGRPREVIKL PRGRETMYSV  
51 VQKSQHRAHK SSSSREPEL LKFTCNATHE LVVRTPSRVR RLSRTIKGVE  
101 YFEVITFEMG QKAPDGRIV ELVKEVSKSY PISEGPERAN ELVESYRKAS  
151 NKAYFENTIE ARDLLLGGSH VRKATYQTYA PilyendHFF DYMOKSKFHL  
201 TIEGPKVLAY LGLNIGDGL SDRATFSVDS RDTSLMERVT EYAEKLNLC<sup>\*</sup>A  
251 EYKDRKEPQV AKTVNLYSKV VRNGIRNNL NTE<sup>\*</sup>NPLMDAI VGLGFLKDGV  
301 KNIPSEFLSD NIGTR<sup>\*</sup>REFLA GLIDSDGYVT DEHGK ATIKTIHTSVRDGL  
351 VSLARSLGLV VSVNAEPAKV DMNGTKHKIS YAIYMSGGDV LLNVLKSCAG  
401 SKKFRPAPAA AFARECRGFY FELQELKEDD YYGITLSDDS DHQFLLANQV  
451 VVHN

**C: Seb1/2**

1 MAEGVFQGA<sup>\*</sup>I GIDLGTYSY VATYESSVEI IANEQGNRYT PSFVAFTPQE  
51 RLIGDAAKNQ AALNPRNTVF DAKRLIGRRF DDES<sup>\*</sup>VQKDMK TWPFKVIDVD  
101 GNPVI<sup>\*</sup>EQYL EETKTFSPQE ISAMVLT<sup>\*</sup>KMK EIAEAKIGKK VEKAVITVPA  
151 YFNDAQRQAT KDAGATSGLN VLRTINEPTA AATAYGLGAG KSEKERHVL I  
201 FDLGGGTDFV SLLHIAGGVY TVKSTSGNTH LGGQDFDTNL LEHFKA<sup>\*</sup>EFKK  
251 KTGLDISDDA RALRRRLTAA ERAKRTLSSV TQTTVEVDSL FDGEDFESSL  
301 TRARFEDLNA ALFKSTLEPV EQVLKDAKIS K<sup>\*</sup>QIDEVVLV GGSTRIPK<sup>\*</sup>VQ  
351 KLLSDFFDGK QLEKSINPDE AVAYGAAVQG AILTQQSTSD ETKDLLLLDV  
401 APLSLGVGMQ GDIFGIVVPR NTVPTIKRR TFTTVSDNQT TVQFPVYQGE  
451 RVNCKENTLL GEFDLKNIPM MPAGEPVLEA IFEVDANGIL KVTAVEKSTG  
501 KSSNITISNA VGRLSSEEIE KMVNOAEEFK AADEFAK<sup>\*</sup>KH EARQRLESY<sup>\*</sup>Y  
551 ASIEQVYDTP VLSSKLRGS KSKIEAALSD ALAALQIEDP SADELKAEV  
601 GLKRVYTKAM SSR

**E: FRDS1**

1 MSLSPVVVIG TGLAGLAAAN ELVNKYNIPV TILEKASSIG GNSIKASSGI  
51 NGA<sup>\*</sup>CTETQRH FHIEDSPRLF EDDTIKSAK GKG<sup>\*</sup>VOELMAKL ANDSP<sup>\*</sup>LATEW  
101 LKNEFDLKL D LLAQLGGHSV ARTHRSSGKL PPGFEIVSAL SNNLKL<sup>\*</sup>LAET  
151 KPELVKINLD SKVVDIHEKD GSISAVVYED KNGEKHMVSA NDV<sup>\*</sup>VFCGGF  
201 GFSKEMKEY APELVNLP<sup>\*</sup>TT NGQQTGDGQ RLLQKLGADL IDMDQIQVHP  
251 TGFIDPNDRS SSWKFLA<sup>\*</sup>ES LRGLGGILLN PITGRREFVNE L<sup>\*</sup>TTRDVVTAA  
301 IQKVC<sup>\*</sup>PQEDN RALLVMGEKM YTDLKNLDF YMFKKLVQKL T<sup>\*</sup>LSQVVSEYN  
351 LPITVAQLCE ELQTYSSFTT KADPLGR<sup>\*</sup>TVI LNEFGSDVTP ETVVFIGEVT  
401 PVVHFTMGGA RINVK<sup>\*</sup>QVIG KNDERLLKGL YAAGEVSGGV HGANRLGGSS  
451 LLEC<sup>\*</sup>VVFGRT AAESIANDRK

**B: Pyk1**

1 MSRLERLTSL NVVAGSDLR<sup>\*</sup>R TSIIGTIGPK TNNPETLVAL RKAGLNIVRM  
51 NFSHGSYEYH KSVIDNARKS EELYPGRPLA IALDTKGPEI RTGTTNDVD  
101 YPIPPNHEMI FTDDKYAKA CDDKIMYVDY KNITKVISAG RIIYVDDGVL  
151 SFQVLEVVD D KTLKVKALNA GKICSHKGVN LPGTDVDLPA LSEKDEDLR  
201 FGVKN<sup>\*</sup>GVHMV FASFIRTAND VLTIREVLGE QGKDVKIIVK IENQGVN<sup>\*</sup>NF  
251 DELK<sup>\*</sup>VTDGV MVAR<sup>\*</sup>DGLGIE IPAPEVLAVQ KKI<sup>\*</sup>AKSNLA GKPVICATQM  
301 LESMTYNPRP TRAEVSDVGN AILDGADCVN LSGETAKGNY PINAVTTMAE  
351 TAVIAEQ<sup>\*</sup>IA YLPNYDDMRN CTPKPTSTTE TSLPRVA<sup>\*</sup>AV EQKAK<sup>\*</sup>AITVL  
401 SISGTT<sup>\*</sup>PRLV SKYRPNCP<sup>\*</sup>II LVTRCPRAAR FSHLYRGVFP FVFEKEPVSD  
451 WTDDVEARIN FGIEKAKEFG ILKKGDTYVS IQGFKAGAGH SNTLQVSTV

**D: Yel057w**

1 MSHFFADHDA PLSMLSVKTE YFPQLT<sup>\*</sup>DKEQ KYAHFMSKAS HAGSRVVMRQ  
51 VSHSEPIFD LILAIHSKLN GKYPEDDITQ KQQTGLYLEY VSQFLSNLGN  
101 FKSFGDTKFI PRCEV<sup>\*</sup>KFFKQ LLELAKINPC SSPLT<sup>\*</sup>LSPVD VNHEFTSHHL  
151 FSTINELIDI GIYHVEEKAA LLGFP<sup>\*</sup>SQGYT SAYYGLPV<sup>\*</sup>T PEDMALLKEQ  
201 LFAELAILPE NTRINKVGEN SFOI<sup>\*</sup>WASEN VKNQITETYP SGQITLSNAV  
251 TKVEFIFGDH SREMLVASY LKEAQKFAAN DTQKAM<sup>\*</sup>LQ<sup>\*</sup>EY INHEVTGSSQ  
301 AHKEAQLWV KDISPVIETN IGF<sup>\*</sup>IETYREP SGI<sup>\*</sup>GEFESL VAIQNKERTA  
351 KFS<sup>\*</sup>SLVNAE EFISLLPWSK DYKPIFNPP DFTSLEVLTF TGSGIPAGIN  
401 IPNYDDVRLK IGFKNVSLGN ILSAAKSSS KHPPSFI<sup>\*</sup>SQE DRPIFEKYQS  
451 DSFEVOYGIH ELLGHGSGKL L<sup>\*</sup>TEFTDGNF DKENPPLGLD GKPVSTY<sup>\*</sup>YK  
501 GETWGSKEGQ LAGPFE<sup>\*</sup>ECRA EVIAMFL<sup>\*</sup>LTN KKILDIFGFH DVESQDKVIY  
551 AGYLQMARAG LLALEY<sup>\*</sup>WNP<sup>\*</sup>K TGK<sup>\*</sup>WQPHMQ ARFSIMK<sup>\*</sup>TFM KHSTDKNFLK  
601 LEMNSTNDDF AIKLDKSLIK TAGHECVKDY LKHLHVYKCS GDVEQGSKYF  
651 IDRSTVTPDL ASLRD<sup>\*</sup>IVLSK RLP<sup>\*</sup>RRQFIQS NSYIDONNKV TLKEYDET<sup>\*</sup>PQ  
701 GMLQSF<sup>\*</sup>LDRE L

**Figure supplement 2 (Related to Figure 3C and 3D): Isolation and identification of Tsa1 binding proteins.**

Amino acid sequences for corresponding spots a-e in Figure 3C represented as A to E, respectively. Underlined regions are peptide regions that were identified in tryptic digests by peptide mass fingerprinting. Cys residues in the identified peptide are indicated as “\*”. None of the Cys residues were modified by NEM, although these Cys residues were carboxymethylated by treatment during trypsinization.

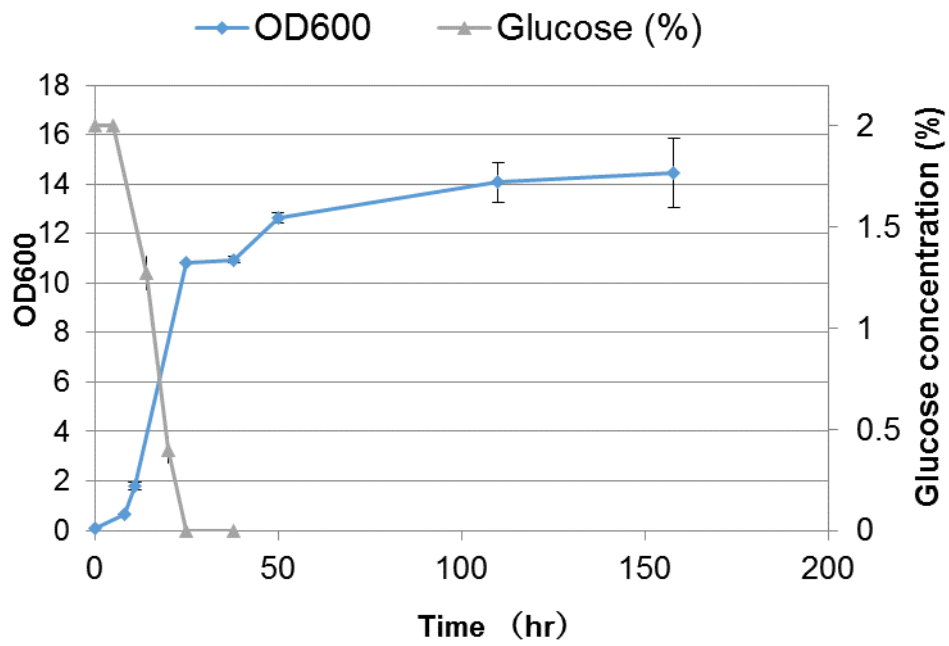

**Figure supplement 3 (Related to *Figure 5B*): Wild type yeast growth and consumption of glucose in glucose medium**  
 The growth curve and glucose consumption of wild type yeast (PYK1<sup>WT</sup>) in SD medium. Glucose consumption was evaluated as described previously<sup>2</sup>.

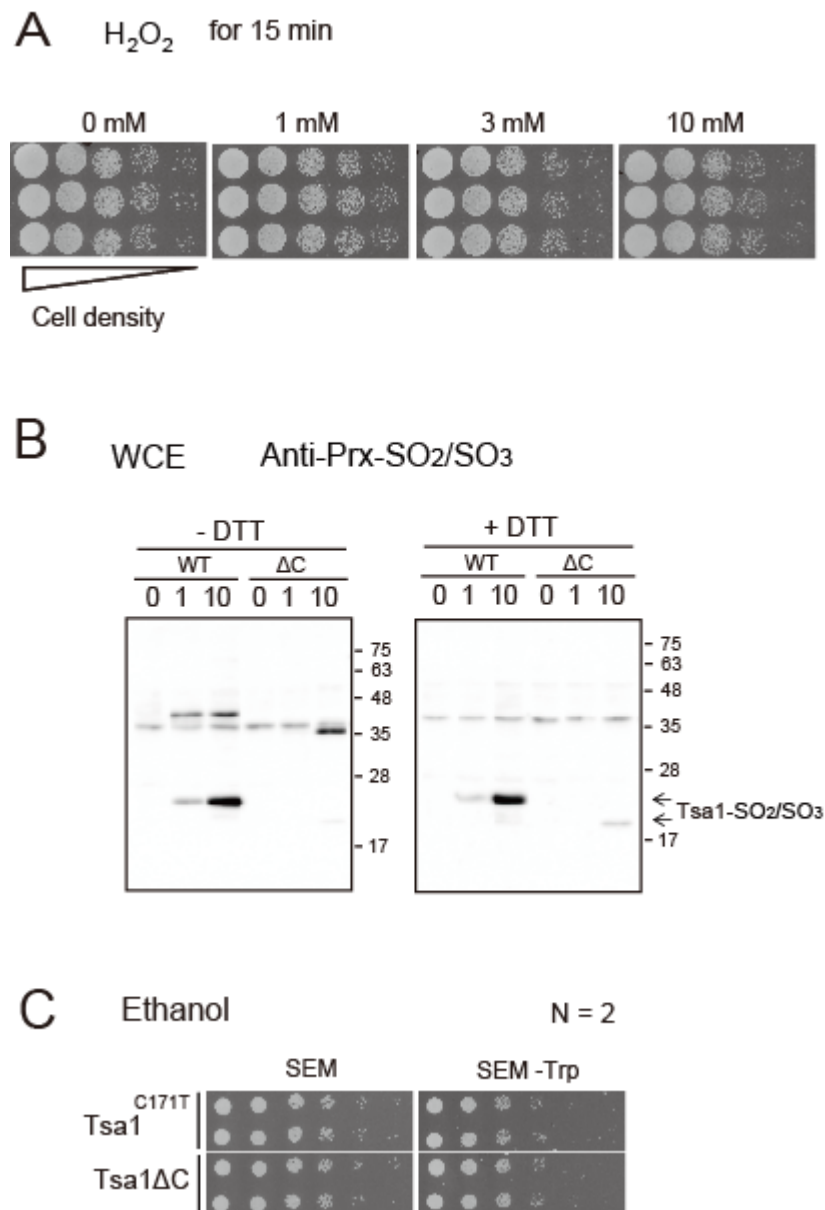

**Figure supplement 4 (Related to Figure 7): Characterization of the hyper oxidation resistant mutant Tsa1ΔC.**

**A.** Resistance of Yeast cells to H<sub>2</sub>O<sub>2</sub>. Wild type cells (PYK1<sup>WT</sup>, N = 3) were cultured for 3 days. The cells were diluted to OD<sub>600</sub> = 1 and treated with 1 mM or 10 mM or 3 mM H<sub>2</sub>O<sub>2</sub> for 15 min. Then, a series of one-fifth dilutions of the cells were spotted on YPAD agar (1% Bacto peptone, 0.5% Bacto yeast extract, 2% glucose, 40 μg/ml adenine hemisulfate, 2% agar). The plates were incubated at 30°C. **B.** Whole cell Lysates described in Figure 7C were immunoblotted by anti-Prx-SO<sub>2</sub>/SO<sub>3</sub> antibody. The positions Tsa1-SO<sub>2</sub>/SO<sub>3</sub> and Tsa1ΔC-SO<sub>2</sub>/SO<sub>3</sub> are indicated by arrows on the right side of the panels. **C.** Spot assay for *tsa1/2Δ* cells carrying plasmids Tsa1<sup>C171T</sup> and Tsa1Δ on SEM or SEM-Trp (N = 2). For plasmid selection, Leu was also omitted from the medium.

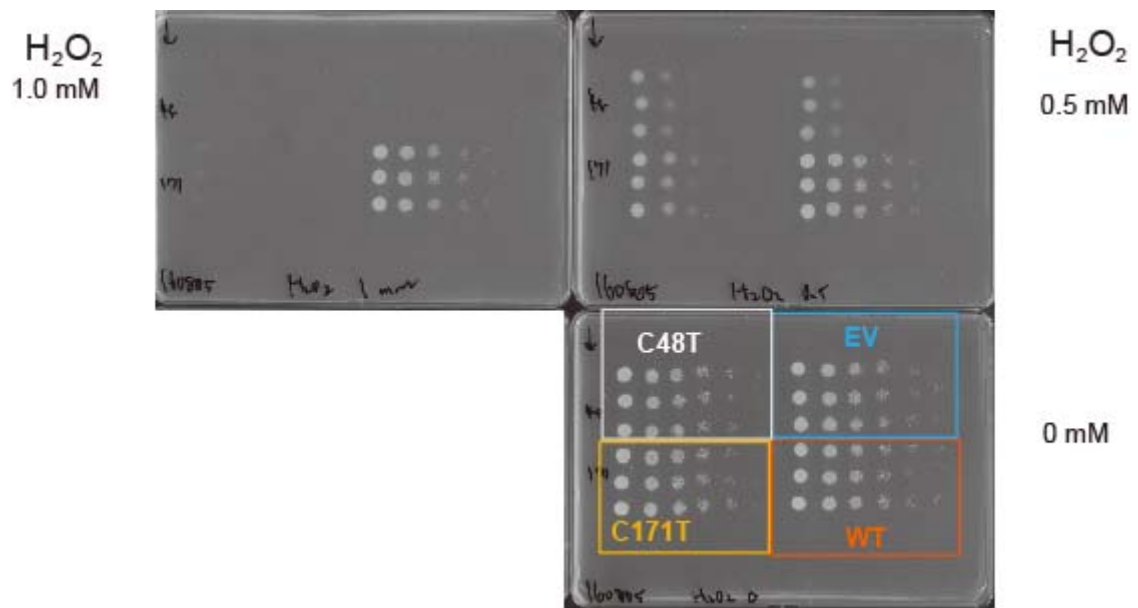

Figure supplement 5 (Related to *Figure 8*): Original image of the spot assay in Figure 8B (N = 3).

**Table supplement 1 (Related to *Discussion*)**

FBP (pmol / 10 OD<sub>600</sub>)

|                                   | Average (n = 3) | Standard error of the mean |
|-----------------------------------|-----------------|----------------------------|
| Exponential (Glucose medium)      | 7626            | 667                        |
| Early stationary (Glucose medium) | 336             | 17                         |
| Exponential (Ethanol medium)      | 425             | 5                          |

FBP concentration in exponential phase cells and early stationary phase cells in SDM (glucose medium), and exponential phase cells (adapted from **Figure 2B**) in SEM –Trp (ethanol medium).

**Table supplement 2 – *Saccharomyces cerevisiae* strains used in this study (related to Materials and Methods)**

|                                   |                                                                           |                       |
|-----------------------------------|---------------------------------------------------------------------------|-----------------------|
| BY4742                            | <i>MATa his3Δ1 lys2Δ0 ura3Δ0</i>                                          | Euroscarf             |
| <i>tsa1Δ</i>                      | <i>tsa1::kanMX</i> (from BY4742)                                          | Tachibana et al. 2009 |
| <i>tsa1/2Δ</i>                    | <i>tsa1::hphMX tsa2::kanMX</i> (from <i>tsa1Δ</i> )                       | Watanabe et al. 2014  |
| <i>pyk1Δ</i>                      | <i>pyk1::kanMX</i> (from BY4742)                                          | this study            |
| PYK1 pro::URA3                    | <i>PYK1::URA3</i> (from BY4742)                                           | this study            |
| PYK1 pro::URA3 <i>tsa1/2Δ</i>     | <i>PYK1::URA3</i> (from <i>tsa1/2Δ</i> )                                  | this study            |
| PYK1 <sup>WT</sup>                | <i>PYK1<sup>WT</sup></i> (from PYK1 pro::URA3)                            | this study            |
| PYK1 <sup>CA</sup>                | <i>PYK1<sup>CA</sup></i> (from PYK1 pro::URA3)                            | this study            |
| PYK1 <sup>WT</sup> <i>tsa1/2Δ</i> | <i>PYK1<sup>WT</sup></i> (from PYK1 pro::URA3Δ <i>tsa1/2Δ</i> )           | this study            |
| <i>tsa1/2Δ</i> URA3               | <i>tsa1::hphMX tsa2::CaURA3</i> (from <i>tsa1Δ</i> )                      | Watanabe et al. 2014  |
| <i>pyk1Δ tsa1/2Δ</i>              | <i>pyk1::kanMX tsa1::hphMX tsa2::CaURA3</i><br>(from <i>tsa1/2Δ</i> URA3) | this study            |
| <i>pyk1Δ</i>                      | <i>pyk1::kanMX</i> (from BY4742)                                          | this study            |



### Supplementary References

- 1 Sprague, G. F., Jr. Isolation and characterization of a *Saccharomyces cerevisiae* mutant deficient in pyruvate kinase activity. *J Bacteriol* **130**, 232-241 (1977).
- 2 Watanabe, T., Irokawa, H., Ogasawara, A., Iwai, K. & Kuge, S. Requirement of peroxiredoxin on the stationary phase of yeast cell growth. *J Toxicol Sci* **39**, 51-58, doi:DN/JST.JSTAGE/jts/39.51 [pii] (2014).
